# Supplementary material for: Application of engineered myoglobins for biosynthesis of clofazimine by integration with chemical synthesis
Source: Royal Society of Chemistry journal article supplement (doi:10.1039/d3ob01687k), 2023-01-01
Supplement: d3ob01687k1.pdf [file d3ob01687k1.pdf]

# Application of Engineered Myoglobins for Biosynthesis of Clofazimine by Integration with Chemical Synthesis

Shuai Tang,<sup>†a</sup> Li-Juan Sun,<sup>†b</sup> Ai-Qun Pan,<sup>a</sup> Jun Huang,<sup>a</sup> Huamin Wang,<sup>\*a</sup> and Ying-Wu Lin<sup>\*a,b,c</sup>

<sup>a</sup> *School of Chemistry and Chemical Engineering, University of South China, Hengyang 421001, China; E-mail: ywlin@usc.edu.cn; huaminwang@usc.edu.cn*

<sup>b</sup> *Hengyang Medical College, University of South China, Hengyang 421001, China.*

<sup>c</sup> *Key Lab of Protein Structure and Function of Universities in Hunan Province, University of South China, Hengyang 421001.*

## Supporting Information

### Contents

|                                                                                       |        |
|---------------------------------------------------------------------------------------|--------|
| <b>Figure S1.</b> UPLC-ESI-MS traces of N-4-CPBDA and N-5-CCPIPA.                     | p. S2  |
| <b>Figure S2.</b> <sup>1</sup> H-NMR spectrum of N-5-CCPIPA.                          | p. S3  |
| <b>Figure S3.</b> <sup>13</sup> C-NMR spectrum of N-5-CCPIPA.                         | p. S4  |
| <b>Figure S4.</b> Comparison of the oxidative coupling of N-4-CPBDA catalyzed by Mbs. | p. S5  |
| <b>Figure S5.</b> Standard curve of N-5-CCPIPA monitored at 486 nm.                   | p. S6  |
| <b>Figure S6.</b> Molecular docking studies of N-4-CPBDA binding to F43Y Mb.          | p. S7  |
| <b>Figure S7.</b> <sup>1</sup> H-NMR spectrum of CFZ.                                 | p. S8  |
| <b>Figure S8.</b> <sup>13</sup> C-NMR spectrum of CFZ.                                | p. S9  |
| <b>Figure S9.</b> ESI-MS spectrum of CFZ.                                             | p. S10 |
| <b>Table S1.</b> Docking results of N-4-CPBDA binding to F43Y/T67R Mb.                | p. S10 |
| <b>Table S2.</b> Docking results of N-4-CPBDA binding to F43Y Mb.                     | p. S11 |

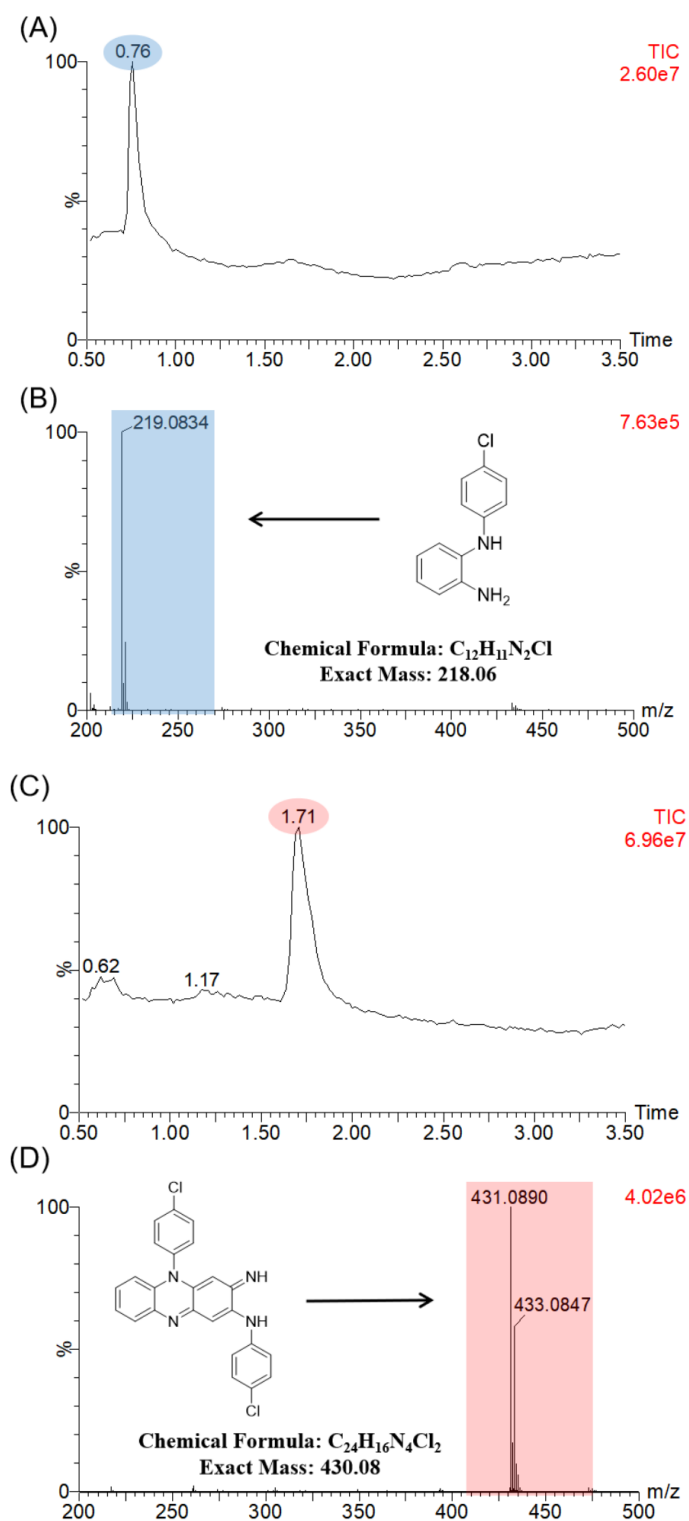

**Figure S1.** UPLC-ESI-MS traces of (A), (B) substrate (0.25 mM, calculated, 218.06 Da; observed, 219.08 Da,  $[M+H]^+$ ), and (C), (D) the oxidative coupling product catalyzed by F43Y/T67R Mb in the presence of 2 mM  $H_2O_2$  at 25 °C (calculated, 430.08 Da; observed, 431.09 Da,  $[M+H]^+$ ).

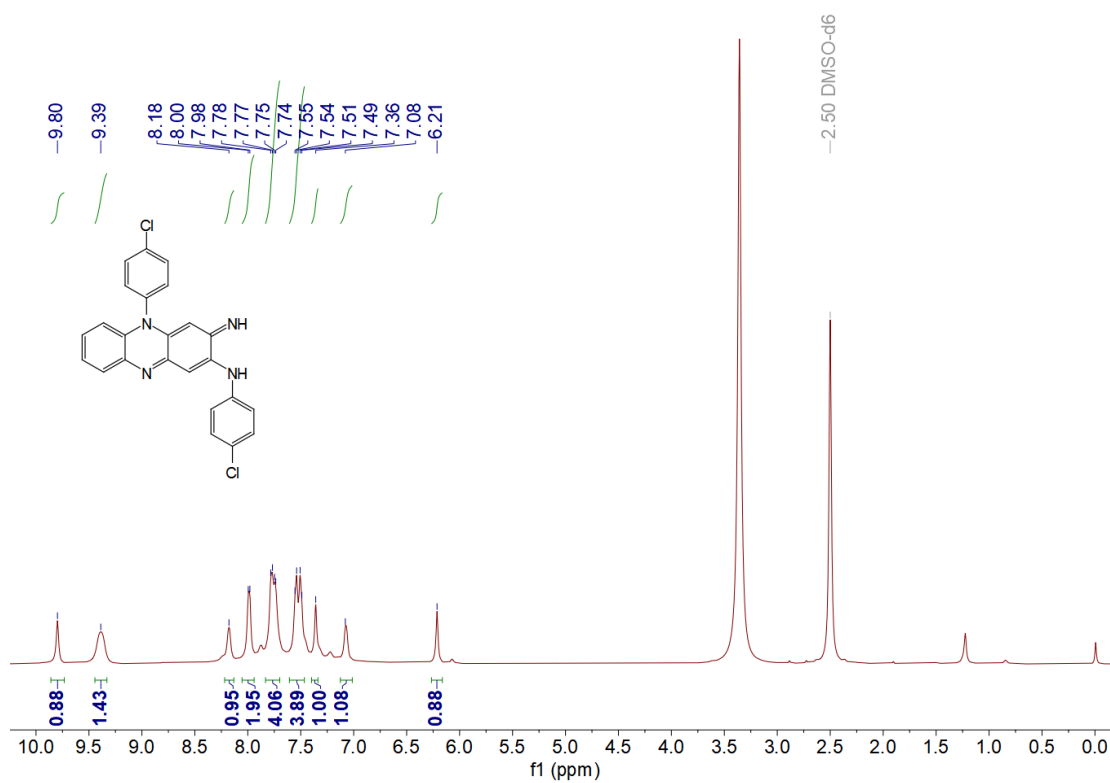

**Figure S2.**  $^1\text{H-NMR}$  (500 Hz) spectrum of N-5-CCPIPA in DMSO- $d_6$  at room temperature.  $\delta(\text{ppm}) = 9.80$  (s, 1H), 9.39 (s, 1H), 8.18 (s, 1H), 7.99 (d,  $J = 7.7$  Hz, 2H), 7.83 – 7.70 (m, 4H), 7.61 – 7.47 (m, 4H), 7.36 (s, 1H), 7.07 (d,  $J = 7.3$  Hz, 1H), 6.21 (s, 1H).

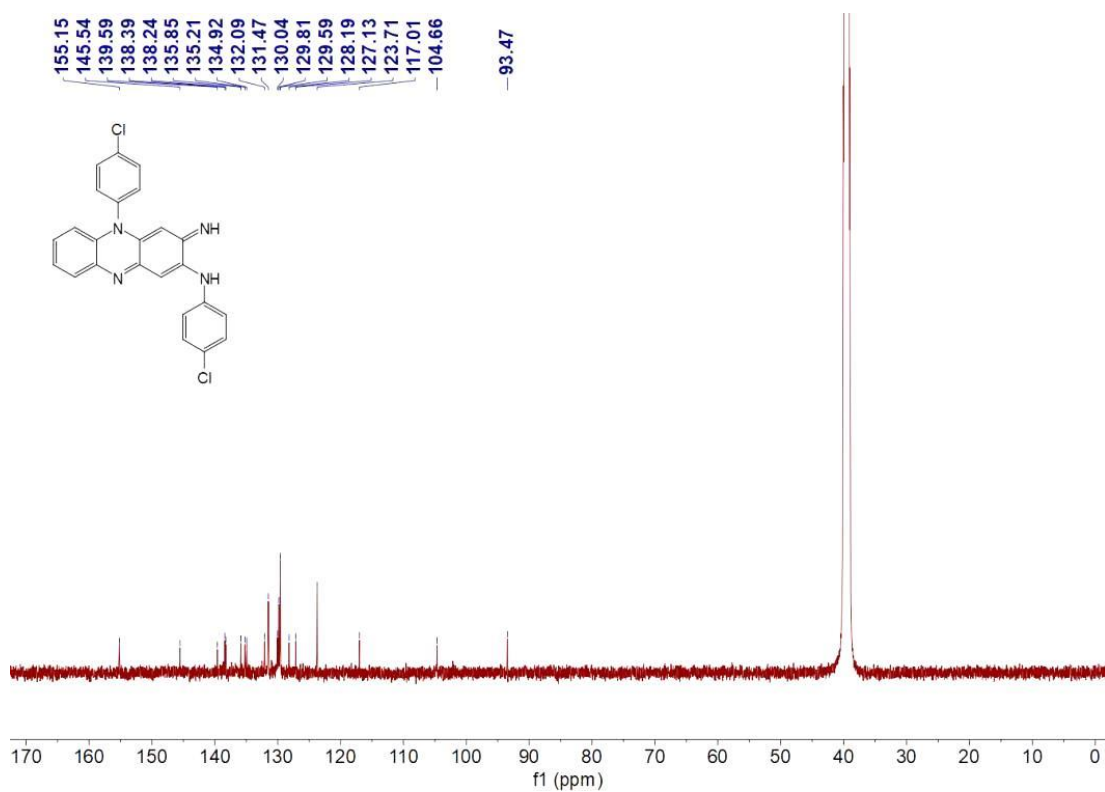

**Figure S3.**  $^{13}\text{C}$ -NMR (126 Hz) spectrum of N-5-CCPIPA in DMSO- $d_6$  at room temperature.  $\delta(\text{ppm}) = 155.16, 145.54, 139.59, 138.39, 138.24, 135.85, 135.21, 134.92, 132.09, 131.47, 130.04, 129.81, 129.59, 128.19, 127.13, 123.72, 117.01, 104.66, 93.47$ .

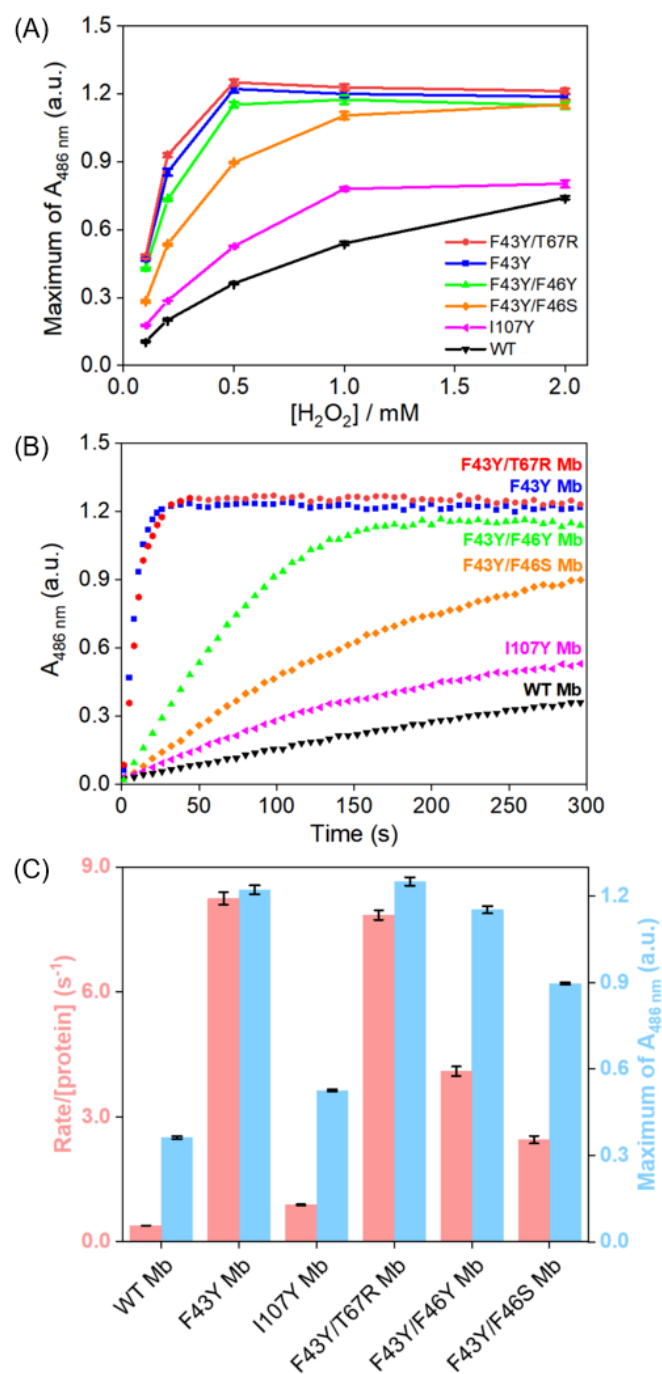

**Figure S4.** (A) Plots of the maximum absorbance of the oxidative coupling product of N-4-CPBDA catalyzed by WT Mb and its mutants at different concentrations of H<sub>2</sub>O<sub>2</sub> within 5 min (pH 6.0, 25 °C). (B) Representative time-dependent absorbance changes at 486 nm, and (C) Comparison of the initial rates and the maximum absorbance of the reactions catalyzed by WT Mb and its mutants with 0.5 mM H<sub>2</sub>O<sub>2</sub>. All assays were carried out in triplicate.

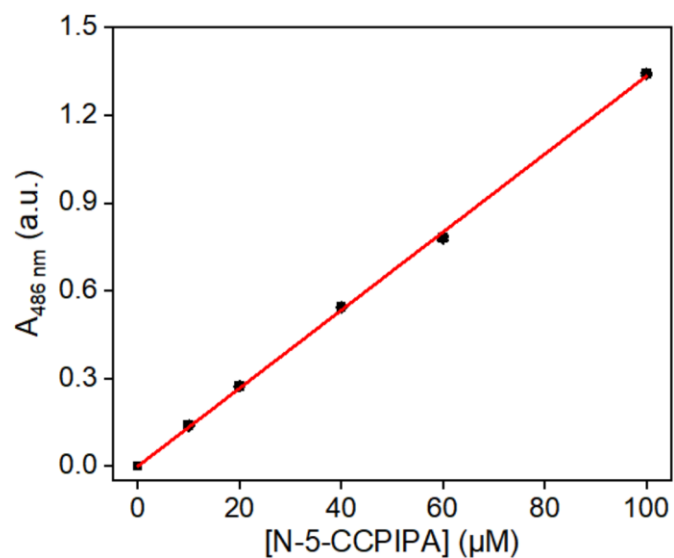

**Figure S5.** Standard curve of N-5-CCPIPA monitored at 486 nm using Agilent 8453 diode array spectrometer. The extinction coefficient was measured to be  $\epsilon_{486 \text{ nm}} = 13 \text{ mM}^{-1} \text{ cm}^{-1}$  (100 mM potassium phosphate buffer containing 5% methanol (v/v), pH 6.0). All assays were carried out in triplicate.

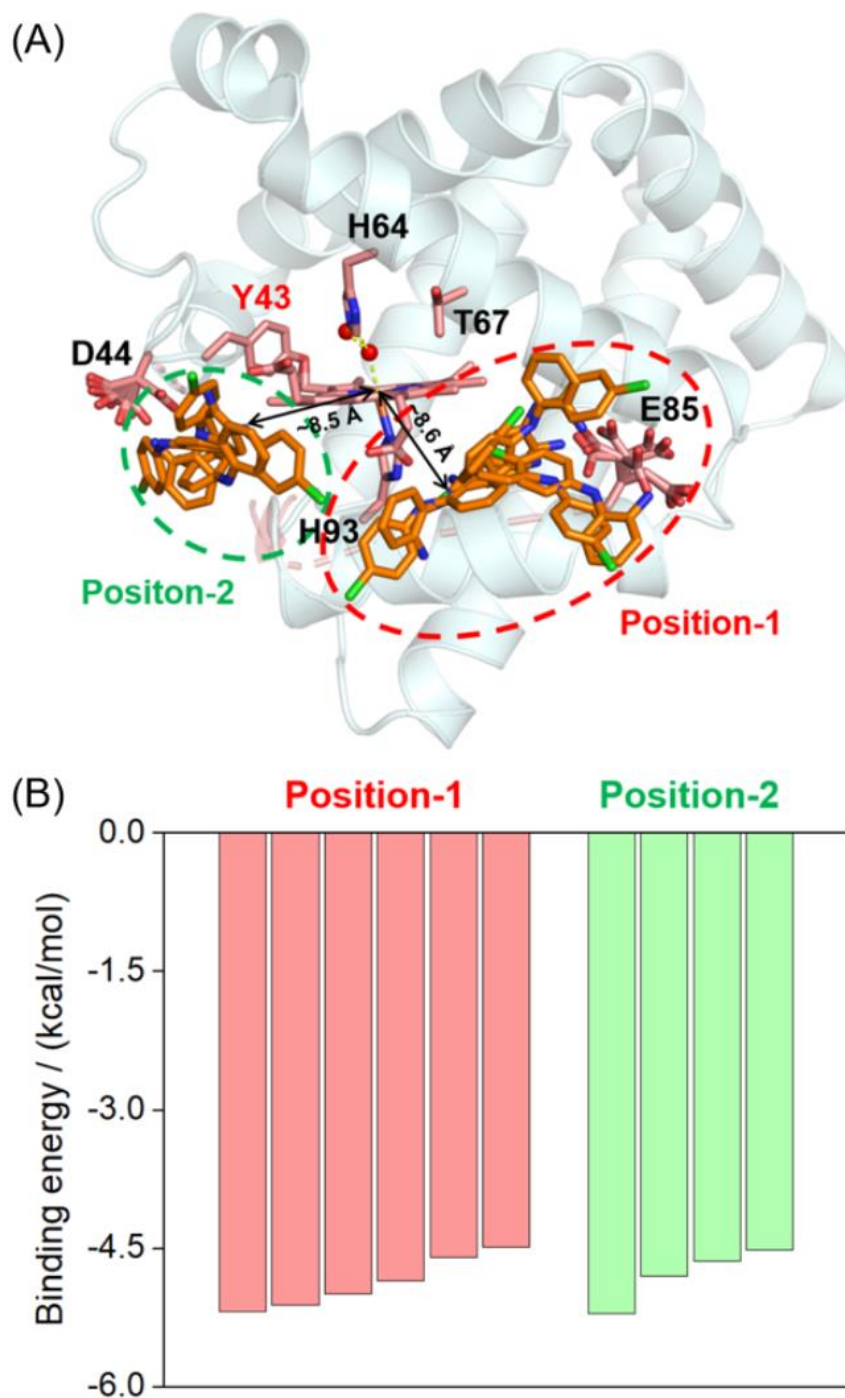

**Figure S6.** (A) Docking structures of N-4-CPBDA binding to F43Y Mb with the lowest 10 binding energies. Dotted arrows indicate the closest distance between the heme iron and the N-atom of the secondary amine of N-4-CPBDA in both positions. The N-4-CPBDA binding positions are indicated by circle lines. (B) Comparison of the binding energies between those bound to the position-1 and position-2.

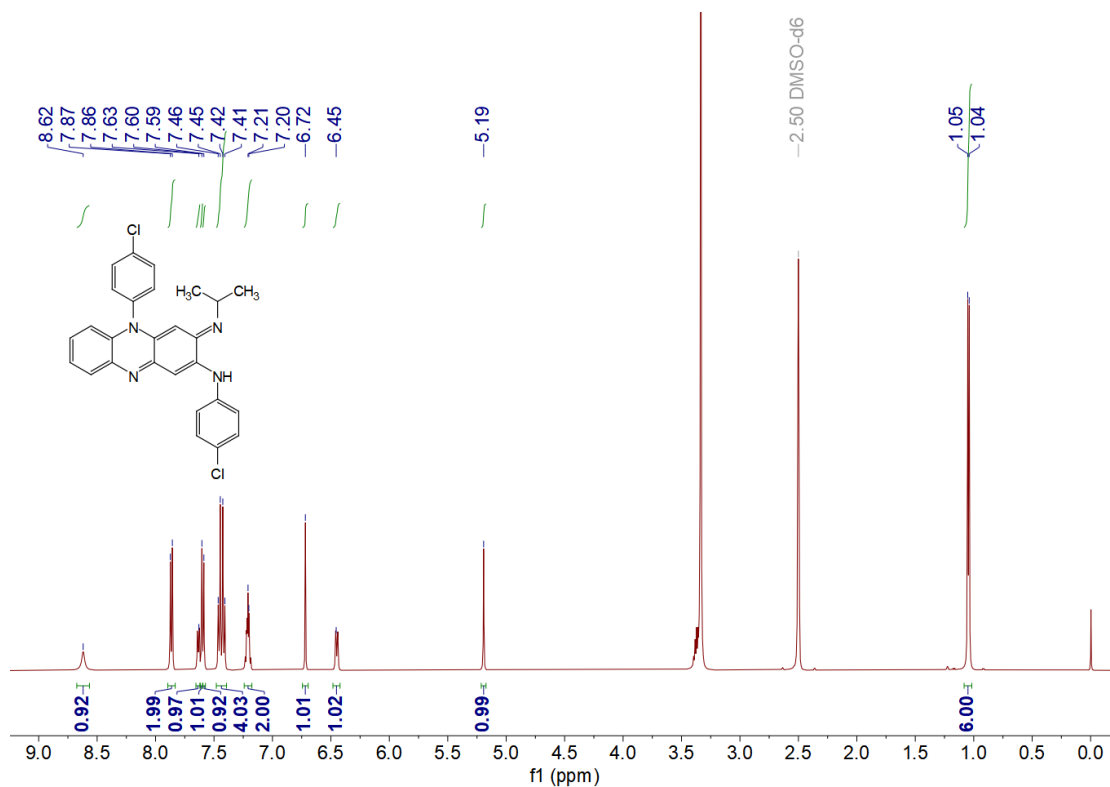

**Figure S7.**  $^1\text{H-NMR}$  (500 Hz) spectrum of CFZ in DMSO- $d_6$  at room temperature.  $\delta(\text{ppm}) = 8.62$  (s, 1H), 7.86 (d,  $J = 8.6$  Hz, 2H), 7.63 (s, 1H), 7.60 (s, 1H), 7.59 (s, 1H), 7.48 – 7.39 (m, 4H), 7.21 (d,  $J = 3.6$  Hz, 2H), 6.72 (s, 1H), 6.45 (s, 1H), 5.19 (s, 1H), 1.04 (d,  $J = 6.2$  Hz, 6H).



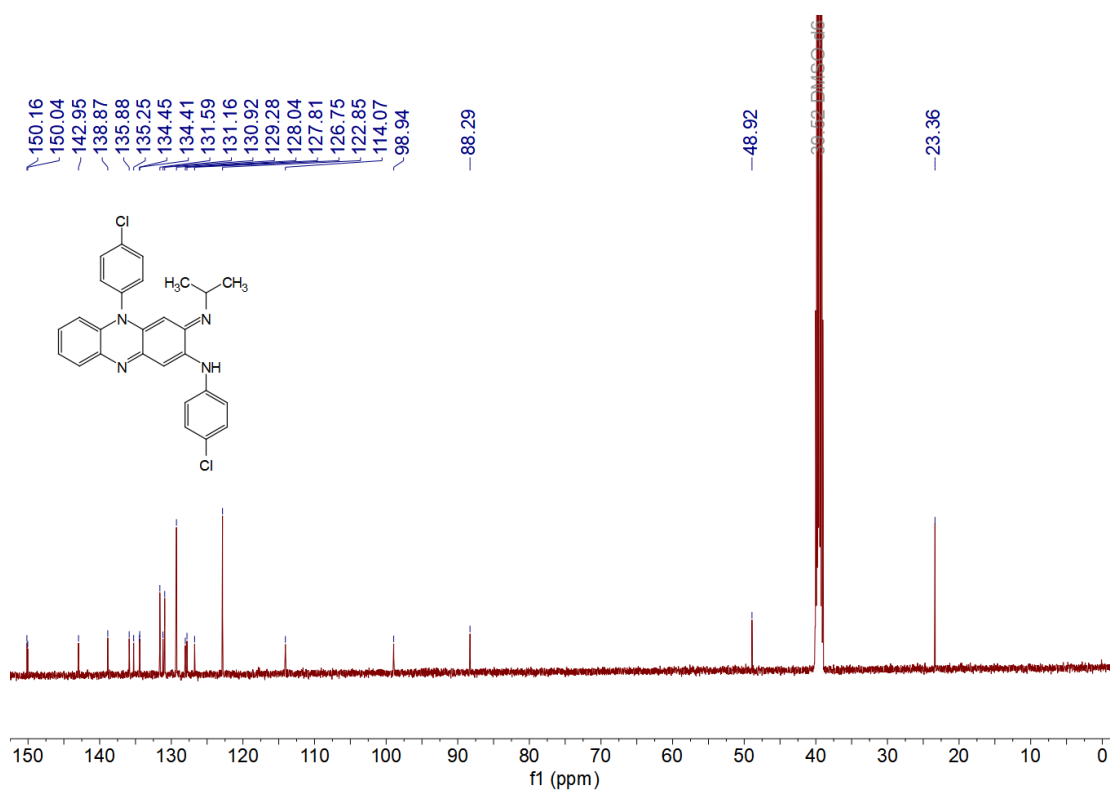

**Figure S8.** <sup>13</sup>C-NMR (126 MHz) spectrum of CFZ in DMSO-d<sub>6</sub> at room temperature.  $\delta(\text{ppm}) = 150.16, 150.04, 142.95, 138.87, 135.88, 135.25, 134.45, 134.41, 131.59, 131.16, 130.92, 129.28, 128.04, 127.81, 126.75, 122.85, 114.07, 98.94, 88.29, 48.92, 23.36.$

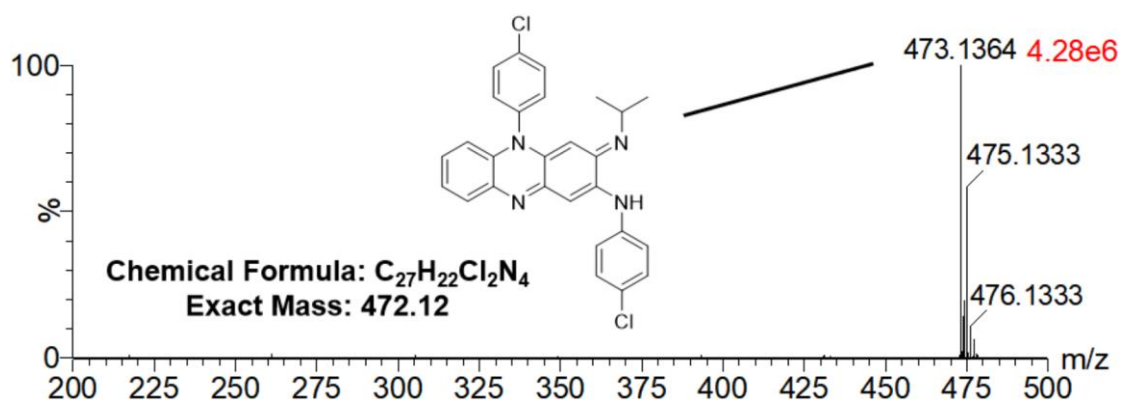

**Figure S9.** ESI-MS spectrum of the synthesized CFZ (calculated, 472.12 Da; observed, 473.14 Da,  $[M+H]^+$ ).

**Table S1.** Docking results of N-4-CPBDA binding to F43Y/T67R Mb.

| Model | $E_{\text{binding}}^a$ | $E_{\text{inter-mol}}^b$ | $E_{\text{vdw}}^c$ | $E_{\text{elec}}^d$ | $E_{\text{total}}^e$ | $E_{\text{torsional}}^f$ |
|-------|------------------------|--------------------------|--------------------|---------------------|----------------------|--------------------------|
| 1     | -5.49                  | -6.39                    | -2.11              | -0.21               | -11.24               | 0.89                     |
| 2     | -4.99                  | -5.88                    | -2.57              | -0.14               | -13.68               | 0.89                     |
| 3     | -4.88                  | -5.78                    | -3.68              | -0.18               | -13.12               | 0.89                     |
| 4     | -4.61                  | -5.5                     | -2.4               | -0.03               | -13.62               | 0.89                     |
| 5     | -4.58                  | -5.47                    | -1.82              | -0.05               | -14.62               | 0.89                     |
| 6     | -4.18                  | -5.07                    | -0.72              | -0.02               | -13.93               | 0.89                     |
| 7     | -4.15                  | -5.04                    | -1.63              | -0.04               | -13.85               | 0.89                     |
| 8     | -4.09                  | -4.98                    | -1.69              | -0.01               | -13.01               | 0.89                     |
| 9     | -4.08                  | -4.97                    | -0.39              | -0.01               | -13.4                | 0.89                     |
| 10    | -4.06                  | -4.96                    | -2.64              | -0.06               | -15.38               | 0.89                     |

<sup>a</sup> Binding energy. <sup>b</sup> Intermolecular energy. <sup>c</sup> van der Waals energies. <sup>d</sup> Electrostatic interaction. <sup>e</sup> Total energy of the complex. <sup>f</sup> Torsional free energy. Unit: kcal/mol.

**Table S2.** Docking results of N-4-CPBDA binding to F43Y Mb.

| <b>Model</b> | <b>E<sub>binding</sub><sup>a</sup></b> | <b>E<sub>inter-mol</sub><sup>b</sup></b> | <b>E<sub>vdw</sub><sup>c</sup></b> | <b>E<sub>elec</sub><sup>d</sup></b> | <b>E<sub>total</sub><sup>e</sup></b> | <b>E<sub>torsional</sub><sup>f</sup></b> |
|--------------|----------------------------------------|------------------------------------------|------------------------------------|-------------------------------------|--------------------------------------|------------------------------------------|
| 1            | -5.21                                  | -6.1                                     | -3.46                              | -0.1                                | -11.73                               | 0.89                                     |
| 2            | -5.19                                  | -6.09                                    | -2.36                              | -0.3                                | -12.73                               | 0.89                                     |
| 3            | -5.12                                  | -6.01                                    | -2.99                              | -0.25                               | -12.04                               | 0.89                                     |
| 4            | -4.99                                  | -5.88                                    | -2.3                               | -0.16                               | -11.65                               | 0.89                                     |
| 5            | -4.85                                  | -5.74                                    | -1.9                               | -0.01                               | -13.49                               | 0.89                                     |
| 6            | -4.8                                   | -5.7                                     | -2.12                              | -0.06                               | -12.74                               | 0.89                                     |
| 7            | -4.64                                  | -5.54                                    | -3.43                              | -0.13                               | -12.5                                | 0.89                                     |
| 8            | -4.6                                   | -5.5                                     | -1.98                              | -0.08                               | -12.43                               | 0.89                                     |
| 9            | -4.52                                  | -5.41                                    | -1.86                              | -0.02                               | -11.85                               | 0.89                                     |
| 10           | -4.49                                  | -5.39                                    | -1.81                              | -0.01                               | -12.56                               | 0.89                                     |

<sup>a</sup> Binding energy. <sup>b</sup> Intermolecular energy. <sup>c</sup> van der Waals energies. <sup>d</sup> Electrostatic interaction. <sup>e</sup> Total energy of the complex. <sup>f</sup> Torsional free energy. Unit: kcal/mol.
